# Supplementary material for: Factors influencing unmet need for contraception amongst adolescent girls and women in Cambodia
Source: PeerJ journal article supplement (doi:10.7717/peerj.10065), 2020-10-07
Supplement: Supplemental_file_2-Figure_S2-_percentage_of_unmet_need.pdf [file Supplemental_file_2-Figure_S2-_percentage_of_unmet_need.pdf]

**Figure 2: Percent distribution of unmet need for contraception in sexually active Cambodian females (urban and rural)**

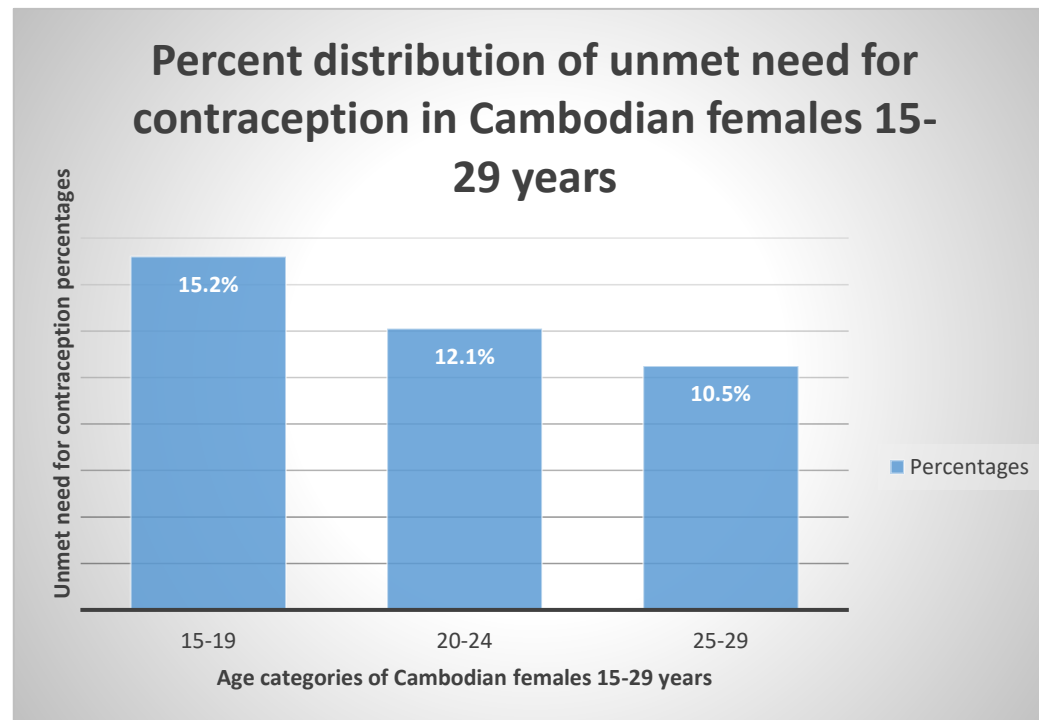

\*Prevalence of unmet need for contraception was highest (15.2%) amongst the adolescent girls aged 15-19 years

\*\* Dataset obtained from 2014 Cambodian Demographic and Health Survey (n= 4823 sexually active females aged 15-29 years)

1. Bronfenbrenner U. The ecology of human development: Harvard university press; 1979.

1. Bronfenbrenner U. The ecology of human development: Harvard university press; 1979.
